# Supplementary material for: Living with Overweight, Rather than a History of Gestational Diabetes, Influences Dietary Quality and Physical Activity during Pregnancy
Source: MDPI journal article supplement (doi:10.3390/nu14030651), 2022-02-03
Supplement: s1 [file s1]

**Table S1.** Home region of the study participants and percentage of births in the area in 2017.

| Area             | Births in the area <sup>a</sup> , % | Home region in the study population, % |
|------------------|-------------------------------------|----------------------------------------|
| Southern Finland | 43.6                                | 43.6                                   |
| Western Finland  | 34.6                                | 38.7                                   |
| Eastern Finland  | 8.5                                 | 7.1                                    |
| Oulu region      | 9.7                                 | 7.2                                    |
| Lapland          | 2.9                                 | 3.4                                    |
| Åland            | 0.5                                 | 0.1                                    |

<sup>a</sup>Calculated from the Finnish perinatal statistics 2017.

**Table S2.** The frequency of using dietary supplements in all the women, in the women with and without a history of gestational diabetes and in the women with normal weight and the women with overweight/obesity.

|                       | All women       | Women with no history of GDM | Women with a history of GDM | Women with normal weight | Women with overweight/obesity |                              |                              |
|-----------------------|-----------------|------------------------------|-----------------------------|--------------------------|-------------------------------|------------------------------|------------------------------|
|                       | <i>n</i> = 1034 | <i>n</i> = 383               | <i>n</i> = 86               | <i>n</i> = 656           | <i>n</i> = 378                |                              |                              |
|                       | <i>n</i> (%)    | <i>n</i> (%)                 | <i>n</i> (%)                | <i>n</i> (%)             | <i>n</i> (%)                  | <i>p</i> -value <sup>a</sup> | <i>p</i> -value <sup>b</sup> |
| Multivitamin          |                 |                              |                             |                          |                               | 0.053 <sup>c</sup>           | 0.003 <sup>c</sup>           |
| 5 to 7 times per week | 753 (76.8)      | 273 (75.8)                   | 63 (76.8)                   | 464 (74.8)               | 289 (80.1)                    |                              |                              |
| 1 to 4 times per week | 46 (4.7)        | 19 (5.3)                     | 8 (9.8)                     | 23 (3.7)                 | 23 (6.4)                      |                              |                              |
| Less than once a week | 10 (1.0)        | 2 (0.6)                      | 1 (1.2)                     | 8 (1.3)                  | 2 (0.6)                       |                              |                              |
| Does not use          | 171 (17.4)      | 66 (18.3)                    | 9 (11.0)                    | 125 (20.2)               | 46 (12.7)                     |                              |                              |
| Vitamin D             |                 |                              |                             |                          |                               | 0.61 <sup>c</sup>            | 0.31 <sup>c</sup>            |
| 5 to 7 times per week | 367 (43.1)      | 131 (41.9)                   | 27 (38.0)                   | 251 (45.4)               | 116 (38.8)                    |                              |                              |
| 1 to 4 times per week | 71 (8.3)        | 28 (8.9)                     | 10 (14.1)                   | 45 (8.1)                 | 26 (8.7)                      |                              |                              |
| Less than once a week | 20 (2.3)        | 11 (3.5)                     | 1 (1.4)                     | 13 (2.4)                 | 7 (2.3)                       |                              |                              |
| Does not use          | 389 (45.7)      | 140 (44.7)                   | 33 (46.5)                   | 242 (43.8)               | 147 (49.2)                    |                              |                              |
| Folic acid            |                 |                              |                             |                          |                               | 0.70 <sup>c</sup>            | 0.34 <sup>c</sup>            |
| 5 to 7 times per week | 344 (40.7)      | 111 (36.4)                   | 21 (30.0)                   | 222 (41.0)               | 122 (40.3)                    |                              |                              |
| 1 to 4 times per week | 29 (3.4)        | 13 (4.3)                     | 2 (2.9)                     | 20 (3.7)                 | 9 (3.0)                       |                              |                              |
| Less than once a week | 11 (1.3)        | 4 (1.3)                      | 0 (0.0)                     | 10 (1.8)                 | 1 (0.3)                       |                              |                              |
| Does not use          | 457 (54.1)      | 175 (57.4)                   | 47 (67.1)                   | 288 (53.1)               | 169 (55.8)                    |                              |                              |
| Calcium               |                 |                              |                             |                          |                               | 0.97 <sup>c</sup>            | 0.48 <sup>c</sup>            |
| 5 to 7 times per week | 165 (19.9)      | 47 (15.6)                    | 9 (13.2)                    | 106 (20.0)               | 59 (19.7)                     |                              |                              |
| 1 to 4 times per week | 47 (5.7)        | 12 (4.0)                     | 2 (2.9)                     | 30 (5.7)                 | 17 (5.7)                      |                              |                              |
| Less than once a week | 18 (2.2)        | 9 (3.0)                      | 2 (2.9)                     | 15 (2.8)                 | 3 (1.0)                       |                              |                              |
| Does not use          | 595 (71.7)      | 229 (76.1)                   | 55 (80.9)                   | 375 (70.8)               | 220 (73.3)                    |                              |                              |
| Iron                  |                 |                              |                             |                          |                               | 0.79 <sup>c</sup>            | 0.65 <sup>c</sup>            |
| 5 to 7 times per week | 121 (14.8)      | 44 (14.8)                    | 7 (10.4)                    | 83 (15.8)                | 38 (13.1)                     |                              |                              |
| 1 to 4 times per week | 44 (5.4)        | 15 (5.0)                     | 3 (4.5)                     | 31 (5.9)                 | 13 (4.5)                      |                              |                              |
| Less than once a week | 13 (1.6)        | 6 (2.0)                      | 2 (3.0)                     | 9 (1.7)                  | 4 (1.4)                       |                              |                              |
| Does not use          | 633 (77.7)      | 229 (76.8)                   | 55 (82.1)                   | 400 (76.2)               | 233 (80.3)                    |                              |                              |
| Fish oil              |                 |                              |                             |                          |                               | 0.53 <sup>c</sup>            | 0.38 <sup>c</sup>            |
| 5 to 7 times per week | 219 (25.6)      | 77 (24.7)                    | 14 (19.7)                   | 153 (27.4)               | 66 (22.1)                     |                              |                              |
| 1 to 4 times per week | 48 (5.6)        | 16 (5.1)                     | 7 (9.9)                     | 29 (5.2)                 | 19 (6.4)                      |                              |                              |
| Less than once a week | 22 (2.6)        | 6 (1.9)                      | 1 (1.4)                     | 16 (2.9)                 | 6 (2.0)                       |                              |                              |
| Does not use          | 565 (65.9)      | 211 (67.6)                   | 49 (69.0)                   | 358 (64.2)               | 207 (69.2)                    |                              |                              |
| Probiotics            |                 |                              |                             |                          |                               | 0.40 <sup>c</sup>            | 0.015 <sup>c</sup>           |
| 5 to 7 times per week | 164 (19.6)      | 54 (17.9)                    | 14 (19.4)                   | 115 (21.1)               | 49 (16.9)                     |                              |                              |
| 1 to 4 times per week | 49 (5.9)        | 22 (7.3)                     | 3 (4.2)                     | 40 (7.3)                 | 9 (3.1)                       |                              |                              |
| Less than once a week | 53 (6.3)        | 25 (8.3)                     | 2 (2.8)                     | 38 (7.0)                 | 15 (5.2)                      |                              |                              |
| Does not use          | 566 (67.8)      | 199 (65.9)                   | 53 (73.6)                   | 350 (64.2)               | 216 (74.5)                    |                              |                              |

GDM, gestational diabetes. <sup>a</sup>between history of GDM groups <sup>b</sup>between normal-weight group and group with overweight/obesity <sup>c</sup>Fisher's exact test.

**Table S3.** Dietary quality and physical activity in the women subdivided by prepregnancy body mass index (BMI) and history of gestational diabetes, primiparous women excluded.

|                                     | Women with normal weight, no history of GDM | Women with over-weight/obesity, no history of GDM | Women with normal weight, history of GDM | Women with over-weight/obesity, history of GDM |                     |
|-------------------------------------|---------------------------------------------|---------------------------------------------------|------------------------------------------|------------------------------------------------|---------------------|
|                                     | <i>n</i> = 252                              | <i>n</i> = 131                                    | <i>n</i> = 31                            | <i>n</i> = 55                                  | <i>p</i> -value     |
| IDQ score, mean (SD)                | 9.7 (2.1)                                   | 8.7 (2.2)                                         | 9.7 (2.2)                                | 9.0 (2.3)                                      | <0.001 <sup>a</sup> |
| Good dietary quality, <i>n</i> (%)  | 131 (52.4)                                  | 42 (32.1)                                         | 16 (55.2)                                | 22 (40.7)                                      | 0.001 <sup>b</sup>  |
| MET-index (MET h/wk), median (IQR)  | 7.5 (10.0)                                  | 4.8 (10.9)                                        | 7.5 (17.6)                               | 4.8 (5.6)                                      | 0.079 <sup>c</sup>  |
| Categorized MET-index, <i>n</i> (%) |                                             |                                                   |                                          |                                                | 0.21 <sup>d</sup>   |
| Light LTPA                          | 120 (48.0)                                  | 78 (60.0)                                         | 13 (43.3)                                | 31 (56.4)                                      |                     |
| Moderate LTPA                       | 104 (41.6)                                  | 42 (32.3)                                         | 13 (43.3)                                | 22 (40.0)                                      |                     |
| Vigorous LTPA                       | 26 (10.4)                                   | 10 (7.7)                                          | 4 (13.3)                                 | 2 (3.6)                                        |                     |

IDQ, Index of Diet Quality; SD, standard deviation; MET, metabolic equivalent; IQR, interquartile range, LTPA, leisure-time physical activity. <sup>a</sup>One-way ANOVA <sup>b</sup>Chi-square test <sup>c</sup>Kruskal-Wallis test <sup>d</sup>Fisher's exact test.
